# Supplementary material for: A New Model for Building Energy Modeling and Management Using Predictive Analytics: Partitioned Hierarchical Multitask Regression (PHMR)
Source: Hindawi journal article supplement (doi:10.1155/2024/5595459), 2024-01-01
Supplement: f1 [file 5595459.f1.docx]

**Supplementary for “**A new model for building energy modeling and management using predictive analytics: Partitioned Hierarchical Multitask Regression (PHMR)**”**

Shuluo Ning1, Hyunsoo Yoon2*

*1Amazon Web* Service, 410 Terry Ave N, Seattle, WA 98109-5210,

*2*Department of Industrial Engineering at Yonsei University, Seoul 03722, Republic of Korea

**1. Introduction**

This supplementary document provides detailed mathematical proofs for "Proof of Proposition 1" and "Proof of Proposition 2" as referenced in the main paper "A new model for building energy modeling and management using predictive analytics: Partitioned Hierarchical Multitask Regression (PHMR)". These proofs are essential for a comprehensive understanding of the theoretical framework and the analytical underpinnings of the PHMR model. While they are too extensive for the main manuscript, their thorough examination is crucial for readers interested in the deeper technical aspects of our research.

**Proof of Proposition 1**

**Proposition 1:** For any leaf node , let be a set of nodes including all the ancestors of and itself. For each , let be the weight associated with node in the hierML penalty in (S-1).

|  | (S-1) |
| --- | --- |

where .

Then,

|  | (S-2) |
| --- | --- |

*Proof*.

Let us suppose that the ordered nodes from the leaf node to the root are . Since the relationship of holds for all, from (S-3)

|  | (S-3) |
| --- | --- |

, we have

**Proof of Proposition 2**

|  | (S-4) |
| --- | --- |

where and .

**Proposition 2:** The equality of (S-4) holds, i.e., , if and only if .

*Proof*: Define , where is a matrix with entries and is a scalar. Thus, we will need to show that . By Cauchy-Schwarz inequality, we have

The equal sign is achieved if and only if . Therefore, the inequality (7) is valid and the equal sign holds if and only if .
